# Supplementary material for: Novel target genes and a valid biomarker panel identified for cholangiocarcinoma
Source: PubMed Central journal article supplement — Epigenetics. 2012 Nov 1;7(11):1249–57. doi: 10.4161/epi.22191 (PMC3499326; doi:10.4161/epi.22191), 2012-11-01
Supplement: epi-7-1249-s01.pdf [file epi-7-1249-s01.pdf]

**Supplemental Material to:**

Andresen K, Boberg KM, Vedeld HM, Honne H, Hektoen M, Wadsworth CA, et al. Novel target genes and a valid biomarker panel identified for cholangiocarcinoma, *Epigenetics* 2012; 7(11); <http://dx.doi.org/10.4161/epi.22191>

<http://www.landesbioscience.com/journals/epigenetics/article/22191>

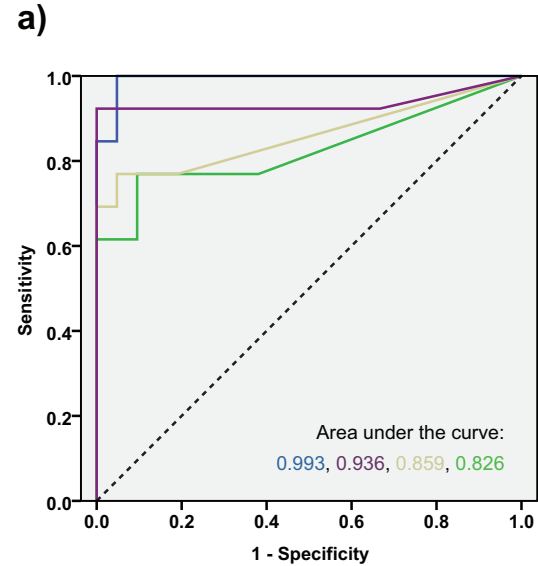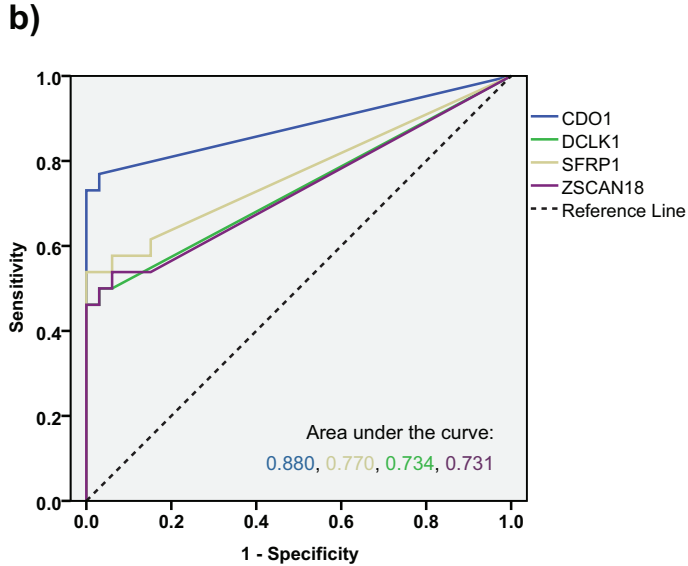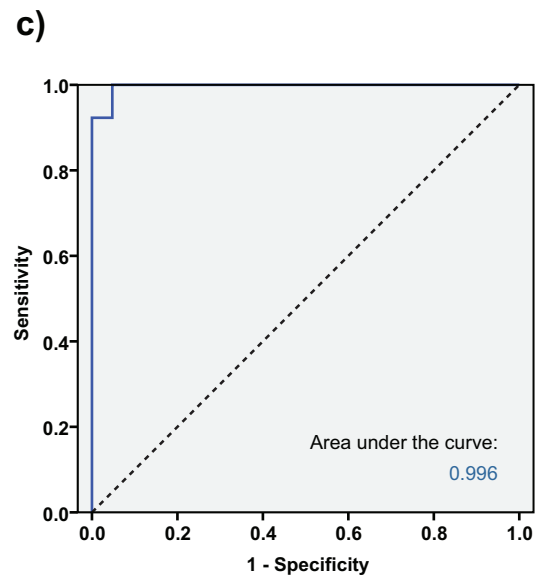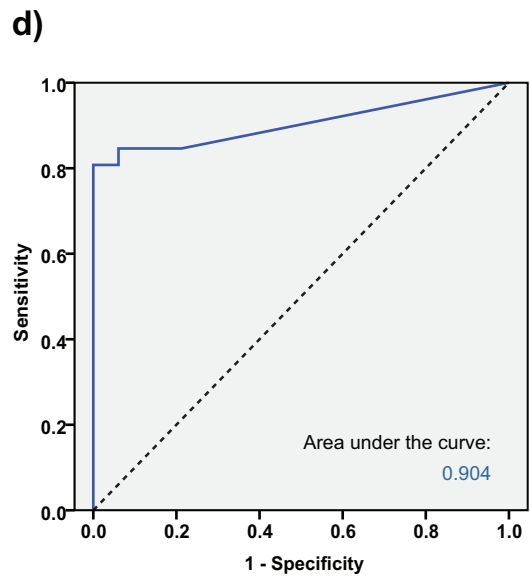



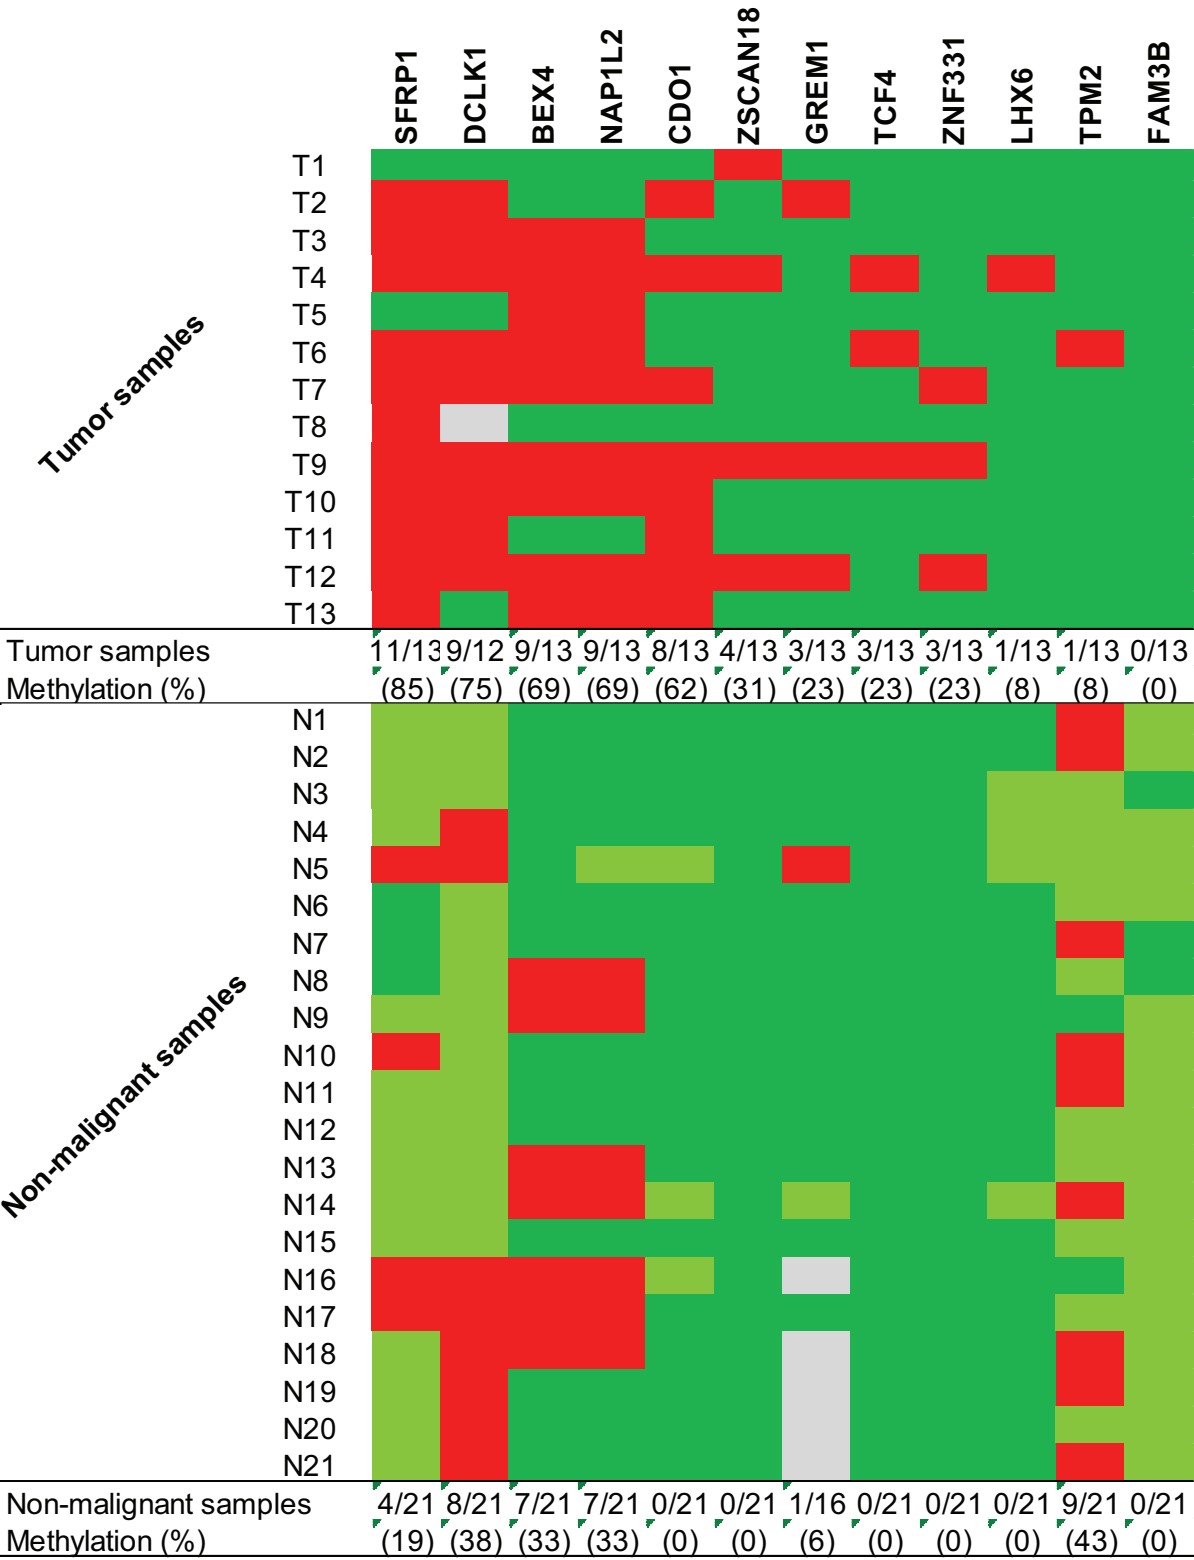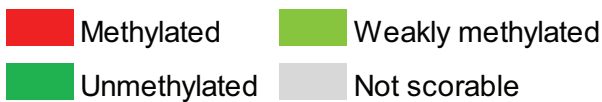

## **Supplementary Appendix**

### **Supplement A**

#### **Nucleic acid isolation**

For cancer cell lines, DNA was isolated using a standard phenol/chloroform procedure and total RNA was isolated using Trizol (Invitrogen, Carlsbad, CA) according to the manufacturer's instructions. RNA quality was assessed using a 2100 bioanalyzer (Agilent Technologies, Palo Alto, CA). For fresh frozen samples, DNA was extracted from approximately 25 mg of tissue using the AllPrep DNA/RNA kit (Qiagen Inc, Valencia, CA). For archival material, DNA was isolated from five sections of paraffin embedded tissue à 20 µm, using the QIAamp DNA kit (Qiagen). Nucleic acid concentration was determined using the ND-1000 Nanodrop (NanoDrop Technologies, Wilmington, DE).

#### **Description of the gene expression microarray analysis**

Standard one-round amplification was performed using the NanoAmp RT-IVT Labeling Kit (Applied Biosystems) according to the manufacturers' protocol. Briefly, cDNA was synthesized from one µg total RNA in an oligo dT primed reaction. Labeled complementary RNA (cRNA) was obtained from double-stranded cDNA in the presence of digoxigenin (DIG)-UTP in an *in vitro* labeling reaction. Samples were hybridized to gene expression microarrays (Human Genome Survey Microarray V2.0, Applied

Biosystems) containing 32,878 oligonucleotide probes representing 29,098 individual genes. Chemoluminescence was measured using the AB1700 Chemoluminescence Analyzer (Applied Biosystems) after incubating the array with alkalic phosphatase-linked digoxigenin antibody. Probe signals were post-processed and quantile normalized using the R-script (R 2.5.0) “ABarray” file 1.2.0 and Bioconductor ([www.bioconductor.org](http://www.bioconductor.org)) and further analyzed in Excel (Microsoft office, version 2007). Array elements with a signal-to-noise ratio <3, and/or a flag value >8191 were discarded from further analysis.

## **Supplement B**

### **CpG island search**

Potential candidate genes for DNA methylation were analyzed for the presence of a CpG island in the promoter region using the CpG island searcher algorithm.<sup>17</sup> Default criteria were used for CpG island detection.<sup>18</sup>

### **Bisulfite treatment of DNA**

Bisulfite treatment of DNA results in the conversion of unmethylated but not methylated cytosines to uracil.<sup>19,20</sup> DNA (1.3 µg) was bisulfite treated using the EpiTect bisulfite kit (Qiagen) according to manufacturers’ protocol. Desulfonation and washing steps were performed using a QIAcube (Qiagen) and the bisulfite treated DNA was eluted in 40 µl elution buffer.

**Qualitative methylation-specific polymerase chain reaction (MSP)**

MSP primers were designed in close proximity of the transcription start site, according to the Human Genome browser (genome.ucsc.edu), using the Methyl Primer Express Software v1.0 (Applied Biosystems). Primers were purchased from MedProbe (MedProbe, Oslo, Norway). Two pairs of primers were used to amplify the loci of interest, one specific for methylated and one specific for unmethylated template. The MSP reaction consisted of one unit HotStarTaq DNA polymerase (Qiagen), 1×PCR buffer (Tris-Cl, KCl(NH<sub>4</sub>)<sub>2</sub>SO<sub>4</sub>, 15 mM MgCl<sub>2</sub>; pH 8.7; Qiagen), 200 μM of each dNTP (Amersham Biosciences, Piscataway, NJ, USA), primers (800 pM each) and 24 ng of bisulfite treated template DNA in a total volume of 25 μl. All MSP reactions were optimized with respect to MgCl<sub>2</sub> concentration, annealing temperature and elongation time (Supplementary Table 4). In addition, the following control experiments were performed for each MSP assay; bisulfite treated and non-bisulfite treated normal lymphocyte DNA was applied in the methylated reaction, and completely methylated DNA was applied in the unmethylated reaction. Thermal cycling (Tetrad 2, Bio-Rad, CA, USA) was performed at 95°C for 15 minutes and 35 subsequent cycles (30 seconds at 95°C, 30 seconds at variable annealing temperatures (Supplementary Table 4), and 30-60 seconds elongation at 72°C) with a final extension of seven minutes at 72°C. Human placental DNA (Sigma Chemical Co, St Louis, MO) treated *in vitro* with *SssI* methyltransferase (New England Biolabs Inc., Beverly, MA) was used as positive control for the methylated reaction and DNA from normal lymphocytes was used as a positive control for the unmethylated reaction. Water, replacing the template, was used as a negative control in both reactions. MSP products were mixed with five μl gel loading buffer (1 x TAE buffer, 20% Ficoll; Sigma Aldrich, and 0.1% xylen cyanol; Sigma Aldrich) and loaded onto a

2% agarose gel (BioRad, Hercules, CA, USA) in 1 x TAE buffer with ethidium bromide (Sigma Aldrich). Electrophoresis was performed at 200V for 25 minutes before MSP products were visualized by UV irradiation using a Gel Doc XR+ (BioRad). All results were verified by a second independent round of MSP and scored independently by two authors (KA and HMV). In cases of discrepancies, a third round of analysis was performed. Scoring was performed using the methylated band intensities of positive controls as a reference. In tissue samples, the methylated band intensities were scored on a scale from zero to five. Tumor samples were only considered methylated when band intensities were equal to or stronger than three. For non-malignant samples, methylated band intensities equal to or stronger than three were scored as methylated, while methylated band intensities equal to or below two were scored as weakly methylated. Only non-malignant samples with the absence of a band in the methylated reaction (intensity 0) were scored as unmethylated.

### **Direct DNA bisulfite sequencing**

Fourteen cancer cell lines (colon, n=6; cholangiocarcinoma, n=6 and gallbladder carcinoma, n=2) were subjected to bisulfite sequencing. DNA bisulfite primers were designed using the Methyl Primer Express Software v1.0 (Applied Biosystems) to cover the area amplified by the MSP. The experimental procedure has been published previously.<sup>21</sup> Briefly, fragments were amplified for 35 cycles using HotStarTaq (Qiagen) and purified using ExoSAP-IT, according to the protocol of the manufacturer (GE Healthcare, USB Corporation, Ohio, USA). Sequencing was performed using the dGTP BigDye Terminator Cycle Sequencing Ready Reaction kit on the AB Prism 3730 (Applied Biosystems). Bisulfite-treated completely methylated DNA (CpGenome Universal Methylated DNA,



Millipore, MA, USA) and DNA from normal lymphocytes served as positive and negative controls, respectively. In accordance with a previous report<sup>22</sup>, the amount of methylcytosine of each CpG site was calculated by the peak height ratio of the cytosine signal versus the sum of cytosine and thymine signal. Methylation of individual CpG sites was determined after the following criteria: 0-0.2 was unmethylated, 0.21-0.8 was partially methylated and 0.81-1.0 was scored as methylated.

### **Quantitative methylation-specific polymerase chain reaction (qMSP)**

Primers and probes were designed using Primer Express v3.0 and purchased from Medprobe and Applied Biosystems, respectively. All qMSP reactions were carried out in triplicates in 384-well plates. The total reaction volume was 20 µl, and included 0.9 µM of each primer, 0.2 µM probes (labelled with 6-FAM and a non-fluorescent quencher), 30 ng bisulfite treated template and 1x TaqMan Universal PCR master mix NoAmpErase UNG (Applied Biosystems). Amplification was performed at 95°C for 15 minutes before 45 cycles of 15 seconds at 95°C and 1 minute elongation at 60 °C, using the TaqMan 7900HF (Applied Biosystems). Bisulfite-converted completely methylated DNA (Millipore) served as a positive control and was also used to generate a standard curve by 1:5 serial dilutions (32.5 – 0.052 ng). The ALU-C4 gene<sup>23</sup> was used for normalization. In addition, bisulfite treated and untreated DNA from normal lymphocytes, and water blanks were used as negative controls.

All samples were censored after cycle 35 (in accordance with Applied Biosystems protocol) and the median quantity value was used for further processing. Briefly, percent methylated reference (PMR) was calculated by dividing the GENE:ALU ratio in the sample by

the GENE:ALU ratio of the positive control (completely methylated DNA) and multiplying by 100. To ensure high specificity, individual fixed thresholds were established for each assay (one for fresh frozen material and one for archival material), using the integer above the highest PMR value across the normal samples. Samples with higher PMR values than the thresholds were scored as methylation positive. For *CDOI*, *DCLK1*, *SFRP1*, and *ZSCAN18* the thresholds for the fresh frozen sample series were 1, 2, 1, and 1, respectively. For the archival sample series, thresholds were set at 2, 2, 5, and 3, respectively.

## Supplementary Figures

**Supplementary Figure 1.** Methylation frequencies in patient material assessed by qualitative methylation-specific polymerase chain reaction (MSP). The twelve group I genes (see figure 2) were investigated in a fresh frozen sample set. Methylation frequencies are indicated for tumor and non-malignant samples. The weakly methylated bands observed among some of the non-malignant samples (light green color) have not been included as methylated in the calculated methylation frequencies.

**Supplementary Figure 2.** Direct bisulfite sequencing of *CDO1*, *DCLK1* and *ZSCAN18* verified the methylation status as assessed by MSP and was concordant with qMSP. a) *CDO1*. b) *DCLK1*. c) *ZSCAN18*. For all panels, the upper line represents the individual CpG sites (vertical bars) in the fragment amplified by the bisulfite sequencing primers. Transcription start site is denoted by +1 and arrows indicate the location of MSP and the subsequently designed qMSP primers and probe. In the lower part of the panels, dark circles indicate methylated CpGs, grey circles indicate partially methylated CpGs, and white circles indicate unmethylated CpGs. The MSP column on the right side of each panel (M, U/M and U) lists the methylation status as assessed by MSP. The box plots in the rightmost column visualize the differences in qMSP PMR values between cell lines that are unmethylated (U), partially methylated (U/M) and fully methylated (M) as assessed by the MSP analysis. In general, there is a good concordance between the qualitative and quantitative results, although this is only statistically significant for *DCLK1*.

**Supplementary Figure 3.** Receiver operating characteristics curves for fresh frozen and archival sample series. The panels depict the resulting area under the receiver operating characteristics curve based on the PMR values for individual biomarkers in the a) fresh frozen sample series and b) archival sample series. c) and d) show the overall performance of the biomarker panel in fresh frozen and archival sample series, respectively

### Reference List

1. Kim BH, Cho NY, Choi M, Lee S, Jang JJ, Kang GH. Methylation profiles of multiple CpG island loci in extrahepatic cholangiocarcinoma versus those of intrahepatic cholangiocarcinomas. *Arch.Pathol.Lab Med.* 2007; 131:923-30.
2. Lee S, Kim WH, Jung HY, Yang MH, Kang GH. Aberrant CpG island methylation of multiple genes in intrahepatic cholangiocarcinoma. *Am.J.Pathol.* 2002; 161:1015-22.
3. Yang B, House MG, Guo M, Herman JG, Clark DP. Promoter methylation profiles of tumor suppressor genes in intrahepatic and extrahepatic cholangiocarcinoma. *Mod.Pathol.* 2005; 18:412-20.
4. Koga Y, Kitajima Y, Miyoshi A, Sato K, Kitahara K, Soejima H et al. Tumor progression through epigenetic gene silencing of O(6)-methylguanine-DNA methyltransferase in human biliary tract cancers. *Ann.Surg.Oncol.* 2005; 12:354-63.

5. Tozawa T, Tamura G, Honda T, Nawata S, Kimura W, Makino N et al. Promoter hypermethylation of DAP-kinase is associated with poor survival in primary biliary tract carcinoma patients. *Cancer Sci.* 2004; 95:736-40.
6. Tannapfel A, Sommerer F, Benicke M, Weinans L, Katalinic A, Geissler F et al. Genetic and epigenetic alterations of the INK4a-ARF pathway in cholangiocarcinoma. *J.Pathol.* 2002; 197:624-31.
7. Ahrendt SA, Eisenberger CF, Yip L, Rashid A, Chow JT, Pitt HA et al. Chromosome 9p21 loss and p16 inactivation in primary sclerosing cholangitis-associated cholangiocarcinoma. *J.Surg.Res.* 1999; 84:88-93.
8. Hong SM, Choi J, Ryu K, Ro JY, Yu E. Promoter hypermethylation of the p16 gene and loss of its protein expression is correlated with tumor progression in extrahepatic bile duct carcinomas. *Arch.Pathol.Lab Med.* 2006; 130:33-8.
9. Liu XF, Kong FM, Xu Z, Yu SP, Sun FB, Zhang CS et al. Promoter hypermethylation of death-associated protein kinase gene in cholangiocarcinoma. *Hepatobiliary.Pancreat.Dis.Int.* 2007; 6:407-11.
10. Foja S, Goldberg M, Schagdarsurengin U, Dammann R, Tannapfel A, Ballhausen WG. Promoter methylation and loss of coding exons of the fragile histidine triad (FHIT) gene in intrahepatic cholangiocarcinomas. *Liver Int.* 2005; 25:1202-8.
11. Liu XF, Zhu SG, Zhang H, Xu Z, Su HL, Li SJ et al. The methylation status of the TMS1/ASC gene in cholangiocarcinoma and its clinical significance. *Hepatobiliary.Pancreat.Dis.Int.* 2006; 5:449-53.

12. Tischoff I, Markwarth A, Witzigmann H, Uhlmann D, Hauss J, Mirmohammadsadeh A et al. Allele loss and epigenetic inactivation of 3p21.3 in malignant liver tumors. *Int.J.Cancer* 2005; 115:684-9.
13. Wong N, Li L, Tsang K, Lai PB, To KF, Johnson PJ. Frequent loss of chromosome 3p and hypermethylation of RASSF1A in cholangiocarcinoma. *J.Hepatol.* 2002; 37:633-9.
14. Uhm KO, Lee ES, Lee YM, Kim HS, Park YN, Park SH. Aberrant promoter CpG islands methylation of tumor suppressor genes in cholangiocarcinoma. *Oncol.Res.* 2008; 17:151-7.
15. Isomoto H, Mott JL, Kobayashi S, Werneburg NW, Bronk SF, Haan S et al. Sustained IL-6/STAT-3 signaling in cholangiocarcinoma cells due to SOCS-3 epigenetic silencing. *Gastroenterology* 2007; 132:384-96.
16. Kim SK, Jang HR, Kim JH, Kim M, Noh SM, Song KS et al. CpG methylation in exon 1 of transcription factor 4 increases with age in normal gastric mucosa and is associated with gene silencing in intestinal-type gastric cancers. *Carcinogenesis* 2008; 29:1623-31.
17. Takai D, Jones PA. The CpG island searcher: a new WWW resource. *In Silico.Biol.* 2003; 3:235-40.
18. Takai D, Jones PA. Comprehensive analysis of CpG islands in human chromosomes 21 and 22. *Proc.Natl.Acad.Sci.U.S.A* 2002; 99:3740-5.

19. Clark SJ, Harrison J, Paul CL, Frommer M. High sensitivity mapping of methylated cytosines. *Nucleic Acids Res.* 1994; 22:2990-7.
20. Herman JG, Graff JR, Myohanen S, Nelkin BD, Baylin SB. Methylation-specific PCR: a novel PCR assay for methylation status of CpG islands. *Proc.Natl.Acad.Sci.U.S.A* 1996; 93:9821-6.
21. Lind GE, Ahlquist T, Kolberg M, Berg M, Eknaes M, Alonso MA et al. Hypermethylated MAL gene - a silent marker of early colon tumorigenesis. *J.Transl.Med.* 2008; 6:13.
22. Melki JR, Vincent PC, Clark SJ. Concurrent DNA hypermethylation of multiple genes in acute myeloid leukemia. *Cancer Res.* 1999; 59:3730-40.
23. Weisenberger DJ, Campan M, Long TI, Kim M, Woods C, Fiala E et al. Analysis of repetitive element DNA methylation by MethyLight. *Nucleic Acids Res.* 2005; 33:6823-36.

## Supplementary tables

**Supplementary Table 1: Overview of methylated genes previously identified in CCA**

| Gene symbol | Location | Function | Sensitivity | Specificity | Number of CCAs | Refs |
|-------------|----------|----------|-------------|-------------|----------------|------|
|-------------|----------|----------|-------------|-------------|----------------|------|

|                                |         |                                    | (%)   | (%)     | analyzed |                 |
|--------------------------------|---------|------------------------------------|-------|---------|----------|-----------------|
| APC                            | 5q21    | Cell adhesion                      | 26-46 | 100, 90 | 72-111   | 1,2,3           |
| BCL2                           | 18q21   | Apoptosis                          | 23    | 97      | 111      | 1               |
| CACNA1G                        | 17q22   | Ion channel                        | 4     | 94      | 111      | 1               |
| CDH1                           | 16q22   | Cell adhesion                      | 22-43 | 100, 90 | 15-111   | 4,2,5,3,1       |
| CDKN2A (p14 <sup>ARF</sup> )   | 9p21    | Cell cycle regulation              | 9- 38 | 100     | 51-111   | 6,3,2,1         |
| CDKN2A (p16 <sup>INK4a</sup> ) | 9p21    | Cell cycle regulation              | 14-77 | 100, 90 | 7-111    | 7,8,1,4,2,6,5,3 |
| CDKN2B (p15 <sup>INK4b</sup> ) | 9p21    | Cell cycle regulation              | 51    | 100     | 72       | 3               |
| CHFR                           | 12q24   | Apoptosis                          | 5, 17 | 100     | 23, 111  | 1,5             |
| DAPK1                          | 9q34    | Apoptosis                          | 3-40  | 100, 93 | 15-79    | 4,9,5,3,2       |
| FHIT                           | 3p14    | Purine metabolism                  | 42    | 89      | 19       | 10              |
| GSTP1                          | 11q13   | Drug metabolism                    | 6-18  | 100, 90 | 72-111   | 1,2,3           |
| HOXA1                          | 7p15.2  | Development                        | 90    | 95      | 111      | 1               |
| IGF2                           | 11p15.5 | Cell growth and<br>differentiation | 23    | 89      | 111      | 1               |
| MGMT                           | 10q26   | DNA repair                         | 4-33  | 100     | 15-111   | 1,4,2,3         |



|         |       |                                    |        |        |         |                |
|---------|-------|------------------------------------|--------|--------|---------|----------------|
| MINT1   | 22q11 | Unknown                            | 38, 41 | 100    | 79, 111 | 1,2            |
| MINT12  | 22q11 | Unknown                            | 51     | 100    | 79      | 2              |
| MINT2   | 22q11 | Unknown                            | 0, 7   | 100    | 79, 111 | 1,2            |
| MINT25  | 22q11 | Unknown                            | 15     | 100    | 79      | 2              |
| MINT31  | 22q11 | Unknown                            | 1, 15  | 100    | 79, 111 | 1,2            |
| MINT32  | 22q11 | Unknown                            | 35     | 100    | 79      | 2              |
| MLH1    | 3p22  | DNA repair                         | 13-47  | 100    | 15-72   | 4,5,3          |
| NEUROG1 | 5q23  | Cell differentiation               | 53     | 89     | 111     | 1              |
| PTGS2   | 1q25  | Biosynthesis in<br>inflammation    | 5      | 100    | 79      | 2              |
| PYCARD  | 16p11 | Apoptosis                          | 36     | 92     | 36      | 11             |
| RARB    | 3p24  | Cell growth and<br>differentiation | 14-18  | 100    | 72, 111 | 1,3            |
| RARRES1 | 3q25  | Membrane protein                   | 22     | 97     | 111     | 1              |
| RASSF1  | 3p21  | Cell cycle regulation              | 28-73  | 50-100 | 13-111  | 10,1,12,5,13,3 |
| RBP1    | 3q21  | Retinol transport                  | 14     | 100    | 111     | 1              |
| RUNX3   | 1p36  | Apoptosis                          | 33, 78 | 100    | 23,111  | 1,5            |

|         |        |                                    |      |     |         |     |
|---------|--------|------------------------------------|------|-----|---------|-----|
| SEMA3B  | 3p21   | Apoptosis                          | 100  | 100 | 15      | 12  |
| SFN     | 1p36   | Apoptosis                          | 59   | 100 | 79      | 2   |
| SFRP1   | 8p11   | Cell growth and<br>differentiation | 63   | 91  | 41      | 14  |
| SOCS3   | 17q25  | Cytokine signaling                 | 88   | 100 | 8       | 15  |
| THBS1   | 15q15  | Cell adhesion                      | 2-11 | 100 | 79, 111 | 1,2 |
| TIMP3   | 22q12  | Cell adhesion                      | 1-9  | 100 | 79-111  | 1,2 |
| TMEFF2  | 2q32.3 | Cell growth and<br>differentiation | 73   | 92  | 111     | 1   |
| TP73    | 1p36   | Cell cycle regulation              | 36   | 100 | 72      | 3   |
| ZMYND10 | 3p21   | Unknown                            | 20   | 100 | 15      | 12  |

---

Genes are listed according to approved gene symbols (HUGO Gene Nomenclature Committee). Genes reported to be unmethylated are not included in the table.

**Supplementary table 2: Gene lists from Figure 2**

---

**N=30 (Up-regulated in treated cell lines and down-regulated in ICC (Miller et al.))**

---

| <b>Gene symbol</b> | <b>Description</b>                                       |
|--------------------|----------------------------------------------------------|
| BDKRB1             | Bradykinin receptor B1                                   |
| BEX4               | Brain expressed, X-linked 4                              |
| CALCOCO1           | Calcium binding and coiled-coil domain 1                 |
| CDO1               | Cysteine dioxygenase, type I                             |
| CRISPLD2           | Cysteine-rich secretory protein LCCL domain containing 2 |
| CSRP1              | Cysteine and glycine-rich protein 1                      |
| CXCL14             | Chemokine (C-X-C motif) ligand 14                        |
| DNAH3              | Dynein, axonemal, heavy chain 3                          |
| DPYSL3             | Dihydropyrimidinase-like 3                               |
| DUSP5              | Dual specificity phosphatase 5                           |
| FKBP1B             | FK506 binding protein 1B                                 |
| GNG11              | Guanine nucleotide binding protein (G protein), gamma 11 |
| GPR124             | G protein-coupled receptor 124                           |

|          |                                                                                                 |
|----------|-------------------------------------------------------------------------------------------------|
| GREM1    | Gremlin 1                                                                                       |
| ID3      | Inhibitor of DNA binding 3, dominant negative helix-loop-helix protein                          |
| INPP5A   | Inositol polyphosphate-5-phosphatase                                                            |
| ITPR1    | Inositol 1,4,5-trisphosphate receptor, type 1                                                   |
| LHX6     | LIM homeobox 6                                                                                  |
| LMCD1    | LIM and cysteine-rich domains 1                                                                 |
| MLLT11   | Myeloid/lymphoid or mixed-lineage leukemia (trithorax homolog, Drosophila); translocated to, 11 |
| MT2A     | Metallothionein 2A                                                                              |
| PLAT     | Plasminogen activator, tissue                                                                   |
| RASIP1   | Ras interacting protein 1                                                                       |
| SERPINF1 | Serpin peptidase inhibitor, clade F, member 1                                                   |
| STXBP1   | Syntaxin binding protein 1                                                                      |
| TCF4     | Transcription factor 4                                                                          |
| TMOD1    | Tropomodulin 1                                                                                  |
| TPM2     | Tropomyosin 2                                                                                   |
| ZNF331   | Zinc finger protein 331                                                                         |
| ZSCAN18  | Zinc finger and SCAN domain containing 18                                                       |

---

**N=8 (Up-regulated in treated cell lines and down-regulated in ICC (Obama et al.))**


---

| <b>Gene symbol</b> | <b>Description</b>                          |
|--------------------|---------------------------------------------|
| FAM3B              | Family with sequence similarity 3, member B |
| HABP4              | Hyaluronan binding protein 4                |
| LUM                | Lumican                                     |
| MT1F               | Metallothionein 1F                          |
| MT1X               | Metallothionein 1X                          |
| RNASE4             | Ribonuclease, RNase A family, 4             |
| SLC46A3            | Solute carrier family 46, member 3          |
| TCN2               | Transcobalamin II                           |

---

**N=6 (Up-regulated in treated cell lines and down-regulated in ICC (Miller et al. and Obama et al.))**


---

| <b>Gene symbol</b> | <b>Description</b>                |
|--------------------|-----------------------------------|
| ATF3               | Activating transcription factor 3 |
| CTGF               | Connective tissue growth factor   |
| EGR2               | Early growth response 2           |
| PRG1               | p53-responsive gene 1             |

PTGDS Prostaglandin D2 synthase 21kDa

TIMP3 TIMP metalloproteinase inhibitor 3

---

**N=2 (Up-regulated in treated cell lines and down-regulated in ICC (Miller et al. and Obama et al.) and ECC (Miller et al.))**

---

| <b>Gene symbol</b> | <b>Description</b> |
|--------------------|--------------------|
|--------------------|--------------------|

---

|     |           |
|-----|-----------|
| CLU | Clusterin |
|-----|-----------|

|      |                  |
|------|------------------|
| TCN1 | Transcobalamin I |
|------|------------------|

---

**N=13 (Up-regulated in treated cell lines and down-regulated in ECC and ICC (Miller et al.))**

---

| <b>Gene symbol</b> | <b>Description</b> |
|--------------------|--------------------|
|--------------------|--------------------|

---

|        |                     |
|--------|---------------------|
| ASRGL1 | Asparaginase like 1 |
|--------|---------------------|

|         |                                    |
|---------|------------------------------------|
| C7orf58 | Chromosome 7 open reading frame 58 |
|---------|------------------------------------|

|       |                            |
|-------|----------------------------|
| DCLK1 | Doublecortin-like kinase 1 |
|-------|----------------------------|

|      |                               |
|------|-------------------------------|
| FHL1 | Four and a half LIM domains 1 |
|------|-------------------------------|

|     |               |
|-----|---------------|
| IL6 | Interleukin 6 |
|-----|---------------|

|      |                       |
|------|-----------------------|
| KLF9 | Kruppel-like factor 9 |
|------|-----------------------|

|      |                            |
|------|----------------------------|
| MMP1 | Matrix metalloproteinase 1 |
|------|----------------------------|

|        |                                                 |
|--------|-------------------------------------------------|
| NAP1L2 | Nucleosome assembly protein 1-like 2            |
| NR4A3  | Nuclear receptor subfamily 4, group A, member 3 |
| PDE2A  | Phosphodiesterase 2A                            |
| REEP1  | Receptor accessory protein 1                    |
| SFRP1  | Secreted frizzled-related protein 1             |
| SYT11  | Synaptotagmin XI                                |

---

**N=1 (Up-regulated in treated cell lines and down-regulated in ECC (Miller et al.))**

---

| <b>Gene symbol</b> | <b>Description</b> |
|--------------------|--------------------|
|--------------------|--------------------|

---

|       |                   |
|-------|-------------------|
| FOLR1 | Folate receptor 1 |
|-------|-------------------|

---

Abbreviations: ICC, intrahepatic cholangiocarcinoma; ECC, extrahepatic cholangiocarcinoma.

#### References:

Miller G, Socci ND, Dhall D, D'Angelica M, DeMatteo RP, Allen PJ et al. Genome wide analysis and clinical correlation of chromosomal and transcriptional mutations in cancers of the biliary tract. *J.Exp.Clin.Cancer Res.* 2009; 28:62.

Obama K, Ura K, Li M, Katagiri T, Tsunoda T, Nomura A et al. Genome-wide analysis of gene expression in human intrahepatic cholangiocarcinoma. *Hepatology* 2005; 41:1339-48.

**Supplementary Table 3: Culturing conditions of cancer cell lines**

| <b>Cell line</b> | <b>Medium</b>                                                        | <b>Additives</b>                                                    |
|------------------|----------------------------------------------------------------------|---------------------------------------------------------------------|
| TFK-1            | Roswell Park Memorial Institute (RPMI) 1640 medium*                  | Penicillin-Streptomycin-Glutamine                                   |
| EGI-1            | Dulbecco's Modified Eagle Medium (DMEM)*                             | Penicillin-Streptomycin-Glutamine                                   |
| HuCCT1           | Roswell Park Memorial Institute (RPMI) 1640 medium*                  | Penicillin-Streptomycin-Glutamine                                   |
| SK-ChA-1         | Minimum Essential Medium (MEM)*                                      | Penicillin-Streptomycin-Glutamine                                   |
| Mz-ChA-1         | Roswell Park Memorial Institute (RPMI) 1640 medium*                  | Penicillin-Streptomycin-Glutamine                                   |
| Mz-ChA-2         | Minimum Essential Medium (MEM)*                                      | Penicillin-Streptomycin-Glutamine                                   |
| KMCU             | Dulbecco's Modified Eagle Medium (DMEM)*                             | Penicillin-Streptomycin-Glutamine                                   |
| KMBC             | Dulbecco's Modified Eagle Medium (DMEM)*                             | Penicillin-Streptomycin-Glutamine<br>and Horse Serum*               |
| PaCa-2           | Dulbecco's Modified Eagle Medium (DMEM)*                             | Penicillin-Streptomycin-Glutamine<br>and MEM Non Essential Amino Ac |
| HPAFII           | Minimum Essential Medium (MEM)*                                      | Penicillin-Streptomycin-Glutamine                                   |
| BxBc-3           | Roswell Park Memorial Institute (RPMI) 1640 medium*                  | Penicillin-Streptomycin-Glutamine                                   |
| AsPc-1           | Roswell Park Memorial Institute (RPMI) 1640 medium*                  | Penicillin-Streptomycin-Glutamine                                   |
| SW48             | Dulbecco's Modified Eagle Medium: Nutrient Mixture F-12 (D-MEM/F12)* | Penicillin-Streptomycin-Glutamine                                   |
| SW480            | Dulbecco's Modified Eagle Medium: Nutrient Mixture F-12 (D-MEM/F12)* | Penicillin-Streptomycin-Glutamine                                   |
| RKO              | Dulbecco's Modified Eagle Medium: Nutrient Mixture F-12 (D-MEM/F12)* | Penicillin-Streptomycin-Glutamine                                   |
| HCT15            | Dulbecco's Modified Eagle Medium: Nutrient Mixture F-                | Penicillin-Streptomycin-Glutamine                                   |



|         |                                                                      |                                   |
|---------|----------------------------------------------------------------------|-----------------------------------|
|         | 12 (D-MEM/F12)*                                                      |                                   |
| LS1034  | Dulbecco's Modified Eagle Medium: Nutrient Mixture F-12 (D-MEM/F12)* | Penicillin-Streptomycin-Glutamine |
| HT29    | Dulbecco's Modified Eagle Medium: Nutrient Mixture F-12 (D-MEM/F12)* | Penicillin-Streptomycin-Glutamine |
| HB8065  | Minimum Essential Medium (MEM)*                                      | Penicillin-Streptomycin-Glutamine |
| JHH-1   | William's Medium E*                                                  | Penicillin-Streptomycin-Glutamine |
| JHH-4   | Minimum Essential Medium (MEM)*                                      | Penicillin-Streptomycin-Glutamine |
| JHH-5   | William's Medium E*                                                  | Penicillin-Streptomycin-Glutamine |
| Panc-1  | Dulbecco's Modified Eagle Medium (DMEM)*                             | Penicillin-Streptomycin-Glutamine |
| CFPAC-1 | Iscove's Modified Dulbecco's Medium (IMDM)#                          | Penicillin-Streptomycin-Glutamine |

---

Medium and additives were added according to requirements for each cell line.

\* Gibco, Invitrogen, Carlsbad, CA, USA

# ATCC, Manassas, VA, USA

**Supplementary Table 4: Cancer cell line genotypes**

| Cell line       | AM EL | CSF1 PO | D13S 317 | D16S 539 | D18 S51 | D19S 433 | D21 S11  | D2S1 338 | D3S1 358 | D5S 818 | D7S 820 | D8S1 179 | FG A   | TH 01 | TP OX | W A        |
|-----------------|-------|---------|----------|----------|---------|----------|----------|----------|----------|---------|---------|----------|--------|-------|-------|------------|
| <b>KM BC</b>    | X     | 12      | 11       | 10       | 13      | 14, 15.2 | 29       | 17       | 15       | 12, 13  | 10, 12  | 10, 14   | 22     | 9.3   | 8, 11 | 16         |
| <b>KM CH-1</b>  | XY    | 11      | 10       | 9        | 14, 17  | 13, 14.2 | 30, 32.2 | 22, 25   | 16       | 10, 12  | 10, 12  | 10, 16   | 22, 23 | 9     | 8, 11 | 14, 18, 19 |
| <b>SK-ChA-1</b> | X     | 12, 13  | 11, 12   | 9, 13    | 16      | 13.2, 14 | 28       | 25       | 15       | 11, 13  | 10      | 13, 14   | 25     | 6     | 8     | 14, 18     |
| <b>Mz-ChA-1</b> | X     | 11      | 8, 10    | 11, 12   | 14      | 13, 15   | 28       | 16, 24   | 15       | 11      | 13, 14  | 13       | 20, 23 | 7     | 8     | 15, 19     |
| <b>Mz-ChA-2</b> | X     | 12      | 12, 13   | 11       | 15      | 13, 16   | 28, 30   | 17, 26   | 18       | 10      | 11, 12  | 13       | 22, 24 | 8     | 8, 11 | 15, 17     |

Genotypes for non-commercial cell lines (listed here) were obtained using the AmpFLSTR

Identifiler PCR Amplification Kit (Applied Biosystems). The size of the analyzed short tandem repeats (STR), analyzed by PCR and subsequent fragment analysis, are shown for each loci.

Amelogenin (Amel) is a gender-determining locus

**Supplementary Table 5: Primer sequences, fragment size, and PCR conditions**

| Primer set   | Sense primer        | Antisense primer   | Frg. Size (bp) | Fragmen t location | El.            |                          |             | Accession number |
|--------------|---------------------|--------------------|----------------|--------------------|----------------|--------------------------|-------------|------------------|
|              |                     |                    |                |                    | An. Te mp (°C) | Mg Cl <sub>2</sub> (m M) | Tim e (sec) |                  |
| ASRGL1_MSP_M | GAGATAGGTGCGCGTT    | ACAACGATTCTACGCCT  | 91             | +60 to +151        | 57             | 1.5                      | 30          | NM_001083        |
| ASRGL1_MSP_U | AGTGAGATAGGTGTGT    | ACAACAATTCTACACCT  | 94             | +57 to +151        | 57             | 1.5                      | 30          |                  |
| ATF3_MSP_M   | AGCGAGTACGTATATTT   | AAAACGAAACCGAAAA   | 174            | -221 to -          |                |                          |             | NM_001040        |
| ATF3_MSP_U   | GGC                 | CG                 | 174            | 47                 | 53             | 1.5                      | 30          | 619              |
|              | AGTAGTGAGTATGTATA   | ACCAAAACAAAACAAA   |                | -224 to -          |                |                          |             |                  |
|              | TTTGGT              | AACA               | 180            | 44                 | 53             | 1.5                      | 30          |                  |
|              | AGGGGTTGATTGAAAA    | TCTAACGCCAAAACGAA  |                | -90 to             |                |                          |             | NM_001080        |
| BEX4_MSP_M   | GTTTC               | ACA                | 132            | +42                | 55             | 1.5                      | 30          | 425              |
| BEX4_MSP_U   | GATAGGGGTTGATTTGA   | AACTCTAACACCAAAC   |                | -93 to             |                |                          |             |                  |
|              | AAGTTTT             | AAAACA             | 138            | +45                | 55             | 1.5                      | 30          |                  |
| CALCOCO1_M   | TACGTTTTTTAGGATGT   | CTTTTACCGCTACGTACT |                |                    |                |                          |             |                  |
| SP_M         | CGC                 | CG                 | 116            | -118 to -2         | 55             | 1.5                      | 30          | NM_020898        |
| CALCOCO1_M   | AATTATGTTTTTTAGGAT  | CCCTTTTACCACTACATA |                |                    |                |                          |             |                  |
| SP_U         | GTTGT               | CTCAA              | 121            | -121 to 0          | 55             | 1.5                      | 30          |                  |
|              | TTGGGACGTCGGAGAT    | GACCCTCGAAAAAAAAA  |                |                    |                |                          |             |                  |
| CDO1_MSP_M   | AAC                 | CGA                | 145            | -153 to -8         | 53             | 1.5                      | 30          | NM_001801        |
|              | TTTTTGGGATGTTGGAG   | AACCCTCAAAAAAAAAA  |                |                    |                |                          |             |                  |
| CDO1_MSP_U   | ATAAT               | CAAAAC             | 148            | -156 to -8         | 53             | 1.5                      | 30          |                  |
|              | TTTTTTTTGTTTAYGTTTT | ACAAATCAAATTCAAAT  |                | -280 to            |                |                          |             |                  |
| CDO1_BS      | A                   | CT                 | 350            | +70                | 49             | 1.7                      | 30          |                  |
| CLU_MSP_M    | TTTTTTTTATTGGAAGCG  | AAAAAATACCGCGAAA   | 165            | -147 to            | 52             | 2.4                      | 30          | NM_001831        |

|             |                    |                    |     |            |    |     |    |           |           |
|-------------|--------------------|--------------------|-----|------------|----|-----|----|-----------|-----------|
|             | TC                 | AAC                |     | +18        |    |     |    |           |           |
|             | GGTTTTTTTTTATTGGAA | CCAAAAATACCACAAA   |     | -150 to    |    |     |    |           |           |
| CLU_MSP_U   | GTGTT              | AAACA              | 170 | +20        | 52 | 2.4 | 30 |           |           |
| CRISPLD2_MS |                    | ACTCAACGTACCGCCTC  |     |            |    |     |    |           |           |
| P_M         | TTCGTTTATTCGGCGTTC | TT                 | 172 | -178 to -6 | 52 | 1.5 | 30 | NM_031476 |           |
| CRISPLD2_MS | TTTTTTGTTTATTTGGTG | AAAACCTCAACATACCAC |     |            |    |     |    |           |           |
| P_U         | TTT                | CTCTT              | 178 | -181 to -3 | 52 | 1.5 | 30 |           |           |
| CSRP1_MSP_  | ACGTGTAAGACGTTTTT  | AACCCGACGATACTACC  |     | -126 to    |    |     |    |           |           |
| M           | CGC                | CTC                | 147 | +21        | 55 | 1.7 | 30 | NM_004078 |           |
|             | GTATGTGTAAGATGTTT  | AACCCAACAATACTACC  |     | -128 to    |    |     |    |           |           |
| CSRP1_MSP_U | TTTGT              | CTCCT              | 149 | +21        | 56 | 1.5 | 30 |           |           |
|             | TCGGAGCGTATAAAAGT  | CTATCGACCGAAACGAC  |     | -34 to     |    |     |    |           |           |
| CTGF_MSP_M  | TTC                | TAC                | 122 | +88        | 56 | 2.5 | 30 | NM_001901 |           |
|             | GTTTGGAGTGTATAAAA  | CTATCAACCAAAACAAC  |     | -36 to     |    |     |    |           |           |
| CTGF_MSP_U  | GTTTT              | TACCA              | 124 | +88        | 56 | 2.5 | 30 |           |           |
| DCLK1_MSP_  | GCGTTTTGTTAAGAAGG  | ACGCGCTCCCTTTTCTTA |     | -127 to -  |    |     |    |           |           |
| M           | GC                 | T                  | 108 | 19         | 53 | 1.5 | 30 | NM_004734 |           |
|             | GTGTTTTGTTAAGAAGG  | ACACACTCCCTTTTCTTA |     | -127 to -  |    |     |    |           |           |
| DCLK1_MSP_U | GT                 | T                  | 108 | 19         | 53 | 1.5 | 30 |           |           |
|             | AAGATTATTTGTGGGGA  | AACCTCTCTCTCCAAAA  |     | -247 to    |    |     |    |           |           |
| DCLK1_BS    | TTAGG              | AAAAA              | 271 | +24        | 57 | 1.5 | 30 |           |           |
| DUSP5_MSP_  | GAGTGAGTTTTTTAGCG  | ATAAATACCGTCCGTAA  |     | -192 to    |    |     |    |           |           |
| M           | AAGC               | CGC                | 198 | +6         | 52 | 1.5 | 30 | NM_004419 |           |
| DUSP5_MSP_  | GAGTGAGTTTTTTAGTG  | ATAAATACCATCCATAA  |     | -192 to    |    |     |    |           |           |
| U           | AAGT               | CAC                | 198 | +6         | 52 | 1.5 | 30 |           |           |
|             | TATATGGGTAGCGACGT  | TCGCCGAACATTAATC   |     |            |    |     |    |           | NM_001136 |
| EGR2_MSP_M  | TAC                | AATTA              | 104 | -108 to -4 | 52 | 2.0 | 30 | 177       |           |
|             | TTATATATGGGTAGTGA  | CCCTCACCAAACTATTA  |     |            |    |     |    |           |           |
| EGR2_MSP_U  | TGTTAT             | ATCAATTA           | 110 | -111 to -1 | 52 | 1.5 | 30 |           |           |

|             |                    |                   |     |            |    |     |    |  |           |  |
|-------------|--------------------|-------------------|-----|------------|----|-----|----|--|-----------|--|
| FAM3B_MSP_  | GGGGAACGGGTTTATTT  | GCGACCAATCGAACAAA |     |            |    |     |    |  |           |  |
| M           | TTC                | T                 | 137 | +17        | 53 | 1.5 | 30 |  | NM_058186 |  |
| FAM3B_MSP_  | GGGGAATGGGTTTATTT  | ACAACCAATCAAACAAA |     |            |    |     |    |  |           |  |
| U           | TTT                | T                 | 137 | +17        | 53 | 1.5 | 30 |  |           |  |
|             | TCGTGTAGTGGGTAGA   | CTCCGCCGAACGATAAA |     |            |    |     |    |  |           |  |
| FHL1_MSP_M  | GTTC               | T                 | 165 | +5         | 57 | 1.5 | 30 |  | NM_001449 |  |
|             | TTTTTGTGTAGTGGGTA  | CCCCTCCACCAAACAAT |     |            |    |     |    |  |           |  |
| FHL1_MSP_U  | GAGTTT             | AAAT              | 171 | +8         | 57 | 1.5 | 30 |  |           |  |
| FKBP1B_MSP_ | GGTTCGTTAATAGTCGG  | CTAAAATCGAACCTAC  |     |            |    |     |    |  |           |  |
| M           | GC                 | GCG               | 126 | 32         | 55 | 2.0 | 30 |  | NM_054033 |  |
| FKBP1B_MSP_ | TTAGGTTTGTAAATAGT  | ACTAAAATCAAAACCTA |     |            |    |     |    |  |           |  |
| U           | TGGGT              | CACAAA            | 130 | 31         | 52 | 1.5 | 30 |  |           |  |
| GNG11_MSP_  | TCGGATGTGATTTGGAA  | CGCGAAAAACGACTAA  |     |            |    |     |    |  |           |  |
| M           | AC                 | ACT               | 112 | +64        | 56 | 1.5 | 30 |  | NM_004126 |  |
| GNG11_MSP_  | ATTTGGATGTGATTTGG  | CCCACAAAAACAACCTA |     |            |    |     |    |  |           |  |
| U           | AAAT               | AACT              | 116 | +66        | 56 | 1.5 | 30 |  |           |  |
| GPR124_MSP_ | GGGTTTAGGTTTGGTTCG | CCGCTCCGTACCATAAA |     |            |    |     |    |  |           |  |
| M           | C                  | TAA               | 119 | -124 to -5 | 55 | 2.5 | 30 |  | NM_032777 |  |
| GPR124_MSP_ | AGAGGGTTTAGGTTTG   | CCACCACTCCATACCAT |     |            |    |     |    |  |           |  |
| U           | GTTGT              | AAATAA            | 125 | -127 to -2 | 55 | 1.5 | 30 |  |           |  |
| GREM1_MSP_  | AGTAGATAAAGAGGCG   | AAATACCGACGACAAAA |     |            |    |     |    |  |           |  |
| M           | AGGC               | CG                | 172 | 26         | 53 | 1.5 | 30 |  | NM_013372 |  |
| GREM1_MSP_  | GGGAGTAGATAAAGAG   | AAATACCAACAACAAAA |     |            |    |     |    |  |           |  |
| U           | GTGAGGT            | CACAA             | 175 | 26         | 53 | 1.5 | 30 |  |           |  |
| HABP4_MSP_  | CGTGACGTGATAGTAGT  | CTATCCGACCCCTACCG |     |            |    |     |    |  |           |  |
| M           | CGGTC              | AC                | 149 | +34        | 58 | 1.5 | 30 |  | NM_014282 |  |
| HABP4_MSP_  | GTGTGATGTGATAGTAG  | CCTATCCAACCCCTACC |     |            |    |     |    |  |           |  |
| U           | TTGGTT             | AAC               | 151 | +35        | 59 | 1.5 | 30 |  |           |  |
| ID3_MSP_M   | TTCGGAGGAGTTGTGGT  | CGCTAATACCGAAAAAA | 173 | -32 to     | 55 | 1.5 | 30 |  | NM_002167 |  |

|             |                    |                    |     |            |    |     |    |           |  |
|-------------|--------------------|--------------------|-----|------------|----|-----|----|-----------|--|
|             | TC                 | AACG               |     | +141       |    |     |    |           |  |
|             | GATTTTGGAGGAGTTGT  | CACTAATACCAAAAAA   |     | -35 to     |    |     |    |           |  |
| ID3_MSP_U   | GGTTT              | AACAAAC            | 176 | +141       | 55 | 1.5 | 30 |           |  |
| INPP5A_MSP_ | TTAGCGGATTTAATGGT  | TAACCGAAACTCCGACC  |     | -20 to     |    |     |    |           |  |
| M           | TGC                | TC                 | 113 | +93        | 50 | 1.5 | 30 | NM_005539 |  |
| INPP5A_MSP_ | TTAGTGGATTTAATGGT  | TAACCAAACTCCAACC   |     | -20 to     |    |     |    |           |  |
| U           | TGT                | TC                 | 113 | +93        | 50 | 1.5 | 30 |           |  |
|             | ATTTAGGGTTTAGTTCG  | ACACTTTAAAACGACTC  |     | -146 to    |    |     |    |           |  |
| ITPR1_MSP_M | GGC                | CGAA               | 148 | +2         | 55 | 2.5 | 30 | NM_002222 |  |
|             | TTTATTTAGGGTTTAGTT | ACTACACTTTAAACAA   |     | -149 to    |    |     |    |           |  |
| ITPR1_MSP_U | TGGGT              | CTCCAAA            | 154 | +5         | 55 | 2.0 | 30 |           |  |
|             | TGCGGTTGTGGTTTTTTT | CCGAAACGACGTTCTCA  |     | -69 to     |    |     |    |           |  |
| LHX6_MSP_M  | C                  | T                  | 100 | +31        | 54 | 1.5 | 30 | NM_014368 |  |
|             | TATTGTGGTTGTGGTTT  | ACACCAAAACAACATTC  |     | -72 to     |    |     |    |           |  |
| LHX6_MSP_U  | TTTTT              | TCAT               | 106 | +34        | 54 | 1.5 | 30 |           |  |
| LMCD1_MSP_  | GGTAGTCGGCGTTTAGT  | CGCAACTAAACCGCTTT  |     | -176 to -  |    |     |    |           |  |
| M           | TTC                | AAT                | 165 | 11         | 55 | 1.5 | 30 | NM_014583 |  |
| LMCD1_MSP_  | TAGGGTAGTTGGTGTTT  | AAACACAATAAACCCAC  |     |            |    |     |    |           |  |
| U           | AGTTTT             | TTTAAT             | 171 | -179 to -8 | 55 | 1.5 | 30 |           |  |
| MLLT11_MSP_ | TTTTTCGGGTTAGTTTTG | AACCGAACGAATTTTCGT |     |            |    |     |    |           |  |
| M           | C                  | AAT                | 110 | -118 to -8 | 51 | 1.8 | 30 | NM_006818 |  |
| MLLT11_MSP_ | GGGTTTTTTGGGTTAGT  | CCAAACCAACAAATTT   |     |            |    |     |    |           |  |
| U           | TTTGT              | CATAAT             | 116 | -121 to -5 | 52 | 1.5 | 30 |           |  |
|             | GTTTAGGGGATTTTGCG  | ACAACCGACCGCTACTT  |     | -110 to    |    |     |    |           |  |
| MT1F_MSP_M  | TTC                | TAA                | 147 | +37        | 55 | 1.5 | 30 | NM_005949 |  |
|             | GTTTAGGGGATTTTGCG  | ACAACCAACCACTACTT  |     | -110 to    |    |     |    |           |  |
| MT1F_MSP_U  | TTT                | TAA                | 147 | +37        | 55 | 1.5 | 30 |           |  |
|             | GGTTTACGGGTTGTTGT  | AAAAACCGACGACTCTC  |     |            |    |     |    |           |  |
| MT1X_MSP_M  | ATTC               | TTT                | 129 | -136 to -7 | 55 | 1.5 | 30 | NM_005952 |  |

|             |                    |                     |     |            |    |     |    |           |  |
|-------------|--------------------|---------------------|-----|------------|----|-----|----|-----------|--|
|             | GGGTTTATGGGTTGTTG  | CAAAAACCAACAACCTCT  |     |            |    |     |    |           |  |
| MT1X_MSP_U  | TATTT              | CTTT                | 131 | -137 to -6 | 55 | 1.5 | 30 |           |  |
| MT2A_MSP_   | GTGTGTAGAGTCGGGT   | AAAACCGAAACGAATAC   |     | -108 to -  |    |     |    |           |  |
| M           | GC                 | AAAA                | 132 | 240        | 55 | 1.5 | 30 | NM_005953 |  |
|             | GTGTGTAGAGTTGGGT   | AAAACCAAAACAAATAC   |     | -108 to -  |    |     |    |           |  |
| MT2A_MSP_U  | GT                 | AAAA                | 132 | 240        | 55 | 1.5 | 30 |           |  |
| NAP1L2_MSP_ | GCGTAATTATATTGCGG  | TACGTTAACCGATCCTA   |     | +8 to      |    |     |    |           |  |
| M           | TATC               | CAA                 | 116 | +124       | 56 | 1.5 | 30 | NM_021963 |  |
| NAP1L2_MSP_ | GTTGTGTAATTATATTG  | AACTACATTAACCAATC   |     | +5 to      |    |     |    |           |  |
| U           | TGGTATT            | CTACAA              | 122 | +127       | 56 | 1.5 | 30 |           |  |
| NR4A3_MSP_  | TTTTCGTATACGCGGAA  | TCGACACGTCATTTATA   |     | -126 to    |    |     |    |           |  |
| M           | TC                 | CCAC                | 142 | +16        | 52 | 1.5 | 30 | NM_173198 |  |
| NR4A3_MSP_  | TTTTTTTTGTATATGTGG | CTCTCAACACATCATTTA  |     | -129 to    |    |     |    |           |  |
| U           | AATT               | TACCAC              | 148 | +19        | 52 | 1.5 | 30 |           |  |
| PDE2A_MSP_  | ATTAGGCGAAGTTGTCG  | CGACTCGTCCGACTTAA   |     | +10 to     |    |     |    | NM_001143 |  |
| M           | C                  | AA                  | 161 | +171       | 53 | 1.8 | 30 | 839       |  |
| PDE2A_MSP_  | GGATTAGGTGAAGTTGT  | AACAACCTCATCCAACCTT |     | +8 to      |    |     |    |           |  |
| U           | TGT                | AAAA                | 165 | +173       | 53 | 1.8 | 30 |           |  |
| REEP1_MSP_  | GGACGCGTTCGTTTTTA  | AACCGCGACACGTTCTA   |     | -162 to -  |    |     |    | NM_001164 |  |
| M           | GTC                | AC                  | 149 | 13         | 55 | 2.5 | 30 | 732       |  |
|             | GTAGGATGTGTTTGT    | AACCACAACACATTCTA   |     | -165 to -  |    |     |    |           |  |
| REEP1_MSP_U | TTAGTT             | ACAAC               | 152 | 13         | 55 | 2.5 | 30 |           |  |
| RNASE4_MSP_ | TAAATTCGGACGAGTT   | TCGCGAAACAATTTATA   |     | -143 to -  |    |     |    |           |  |
| M           | TTC                | TTTC                | 101 | 42         | 53 | 2.5 | 30 | NM_002937 |  |
| RNASE4_MSP_ | GTTTAAATTTTGGATGA  | CCATCACAAAACAATTT   |     | -146 to -  |    |     |    |           |  |
| U           | GTTTTT             | ATATTTTC            | 107 | 39         | 53 | 1.5 | 30 |           |  |
| SFRP1_MSP_  | TAGTAAATCGAATTCGT  | TACGCGAAACTCCTACG   |     | -138 to    |    |     |    |           |  |
| M           | TCGC               | AC                  | 141 | +3         | 45 | 1.5 | 30 | NM_003012 |  |
| SFRP1_MSP_U | TTTTAGTAAATTGAATTT | TACACAAAACCTCCTACA  | 144 | -141 to    | 45 | 1.5 | 30 |           |  |

|             |                    |                    |     |            |    |     |    |           |
|-------------|--------------------|--------------------|-----|------------|----|-----|----|-----------|
|             | GTTTGT             | ACCAA              |     | +3         |    |     |    |           |
| SLC46A3_MSP | GTTGAGTGGTTGTTTCGG | CCCGACTCTCCTACGAT  |     |            |    |     |    |           |
| _M          | TC                 | TAA                | 151 | -152 to -1 | 57 | 1.5 | 30 | NM_181785 |
| SLC46A3_MSP | GTGTTGAGTGGTTGTTT  | TACCCAACCTCTCCTACA |     | -154 to    |    |     |    |           |
| _U          | GGTT               | ATTAA              | 155 | +1         | 58 | 1.5 | 30 |           |
| SYT11_MSP_  | CGTTTTGGAATTATAGC  | TTCCGAATAATCCTCGA  |     | -222 to -  |    |     |    |           |
| M           | GC                 | AA                 | 158 | 64         | 50 | 1.8 | 30 | NM_152280 |
|             | TTTTGTTTTGGAATTATA | CTCTTCCAAATAATCCTC |     | -225 to -  |    |     |    |           |
| SYT11_MSP_U | GTGT               | AAAA               | 164 | 61         | 50 | 1.8 | 30 |           |
| TCF4_MSP_M  | GAATTTGTAATTCGTG   | AAAAAAAACTCTCCGTA  |     | +322 to    |    |     |    | NM_001083 |
| *           | CGTTTC             | CACCG              | 258 | +580       | 57 | 1.5 | 60 | 962       |
|             | TGAATTTGTAATTTTGT  | AAAAAAAACTCTCCATA  |     | +321 to    |    |     |    |           |
| TCF4_MSP_U* | GTGTTTTG           | CACCACC            | 259 | +580       | 57 | 1.5 | 60 |           |
|             | ATCGTCGGGGTTTTTTTT | AACAAAAACACGACCCG  |     |            |    |     |    | NM_001145 |
| TPM2_MSP_M  | AGTC               | AC                 | 152 | -156 to -4 | 61 | 1.5 | 30 | 822       |
|             | GTATTGTTGGGGTTTTTT | AAACAAAAACACAACCC  |     |            |    |     |    |           |
| TPM2_MSP_U  | TTAGTT             | AACC               | 155 | -158 to -3 | 61 | 1.5 | 30 |           |
| ZNF331_MSP_ | GGTAGGACGTTTTTAGG  | ATACAACCTACACGAC   |     | -120 to    |    |     |    |           |
| M           | GTC                | GCA                | 143 | +23        | 55 | 1.7 | 30 | NM_018555 |
| ZNF331_MSP_ | TAAGGTAGGATGTTTTT  | AACATACAACCTACAC   |     | -120 to    |    |     |    |           |
| U           | AGGGTT             | AACACA             | 143 | +23        | 55 | 1.5 | 30 |           |
| ZSCAN18_MSP | GTTTAAAATGACGTAGG  | AATACCGCGAAACTATA  |     | -52 to     |    |     |    |           |
| _M          | CGTC               | CCG                | 131 | +79        | 55 | 1.8 | 30 | NM_023926 |
| ZSCAN18_MSP | GGTGTAAAATGATGT    | ACAATACCACAAAATA   |     | -55 to     |    |     |    |           |
| _U          | AGGTGTT            | TACCAC             | 131 | +79        | 55 | 1.5 | 30 |           |
|             | TTTTGTTGTTAGGGGT   | ACCCACCTACTACRCAA  |     | -106 to    |    |     |    |           |
| ZSCAN18_BS  | TTATT              | CTAC               | 302 | +196       | 59 | 1.5 | 30 |           |

From hg18 to hg19, the transcription start point of *DCLK1* NM\_004734 was moved 50 bp upstream. The MSP primers were originally designed to be located -177 to -69 relative to the



transcription start site. \*Primer sequences and amplification conditions were obtained from Kim and colleagues.<sup>16</sup>
